# Supplementary material for: Patients' experiences of remote communication after pacemaker implant: The NORDLAND study
Source: PubMed Central journal article supplement (PMC6586402; doi:10.1371/journal.pone.0218521), 2019-06-20
Supplement: pone.0218521.s001.pdf [file pone.0218521.s001.pdf]

## NORDLAND STUDY – SUPPORTING INFORMATION

| Item                                                                                                                                                         | Variable                                                                          | Coding                                                                                                                     |
|--------------------------------------------------------------------------------------------------------------------------------------------------------------|-----------------------------------------------------------------------------------|----------------------------------------------------------------------------------------------------------------------------|
| Variable 1                                                                                                                                                   | Type of follow up                                                                 | 1 = Remote<br>2 = Hospital                                                                                                 |
| Variable 2                                                                                                                                                   | Sex                                                                               | 0 = man<br>1 = woman                                                                                                       |
| <b>The Generic Short Patient Experiences Questionnaire – GS-PEQ (validated by Strømseng Sjetne, 2011)<br/>(n=49, n=25 remote, n=24 hospital, n=1 exitus)</b> |                                                                                   |                                                                                                                            |
| Question 1                                                                                                                                                   | Did the clinicians talk to you in a way that was easy to understand?              | 1 = Not at all<br>2 = To a small extent<br>3 = To a moderate extent<br>4 = To a large extent<br>5 = To a very large extent |
| Question 2                                                                                                                                                   | Do you have confidence in the clinicians' professional skills?                    | 1 = Not at all<br>2 = To a small extent<br>3 = To a moderate extent<br>4 = To a large extent<br>5 = To a very large extent |
| Question 3                                                                                                                                                   | Did you get sufficient information about your diagnosis/afflictions?              | 1 = Not at all<br>2 = To a small extent<br>3 = To a moderate extent<br>4 = To a large extent<br>5 = To a very large extent |
| Question 4                                                                                                                                                   | Did you perceive the treatment as adapted to your situation?                      | 1 = Not at all<br>2 = To a small extent<br>3 = To a moderate extent<br>4 = To a large extent<br>5 = To a very large extent |
| Question 5                                                                                                                                                   | Were you involved in decisions regarding your treatment?                          | 1 = Not at all<br>2 = To a small extent<br>3 = To a moderate extent<br>4 = To a large extent<br>5 = To a very large extent |
| Question 6                                                                                                                                                   | Did you perceive the institution's work as well organized?                        | 1 = Not at all<br>2 = To a small extent<br>3 = To a moderate extent<br>4 = To a large extent<br>5 = To a very large extent |
| Question 7                                                                                                                                                   | Did you have to wait before you were admitted for services at the institution?    | 1 = Not at all<br>2 = To a small extent<br>3 = To a moderate extent<br>4 = To a large extent<br>5 = To a very large extent |
| Question 8                                                                                                                                                   | Overall, was the help and treatment you received at the institution satisfactory? | 1 = Not at all<br>2 = To a small extent<br>3 = To a moderate extent<br>4 = To a large extent<br>5 = To a very large extent |
| Question 9                                                                                                                                                   | Overall, what benefit have you had from the care at the institution?              | 1 = Not at all<br>2 = To a small extent<br>3 = To a moderate extent<br>4 = To a large extent<br>5 = To a very large extent |
| Question 10                                                                                                                                                  | Do you believe that you were in any way given incorrect treatment?                | 1 = Not at all<br>2 = To a small extent<br>3 = To a moderate extent                                                        |

## NORDLAND STUDY – SUPPORTING INFORMATION

|                                                                                                                                                           |                                                                                                                                                  |                                                                                        |
|-----------------------------------------------------------------------------------------------------------------------------------------------------------|--------------------------------------------------------------------------------------------------------------------------------------------------|----------------------------------------------------------------------------------------|
|                                                                                                                                                           |                                                                                                                                                  | 4 = To a large extent<br>5 = To a very large extent                                    |
| <b>Survey on telehealth patient experience</b><br>(adapted version from Abrams & Geier, 2006; Bas-Villalobos, 2010)<br>(n=48, n=24 remote, n=24 hospital) |                                                                                                                                                  |                                                                                        |
| Question 11                                                                                                                                               | How many kilometers is your home from hospital?                                                                                                  |                                                                                        |
| Question 12                                                                                                                                               | How much time does it take you to attend a cardiology consultation?                                                                              | 1 = < 1 hour<br>2 = 1 - 2 hours<br>3 = 2 - 3 hours<br>4 = 3 - 4 hours<br>5 = > 4 hours |
| Question 13                                                                                                                                               | What type of transport do you use to travel to hospital?                                                                                         | 1 = Public transport<br>2 = Own car<br>3 = Ambulance<br>4 = Taxi<br>5 = Other          |
| Question 14                                                                                                                                               | Which is your labour situation now?                                                                                                              | 1 = Working<br>2 = Unemployed<br>3 = Pensioner<br>4 = Sick leave<br>5 = Other          |
| Question 15                                                                                                                                               | Do you need to be accompanied by any relative or friend to attend the cardiology consultation at hospital?                                       | 1 = No<br>2 = Yes                                                                      |
| Question 16                                                                                                                                               | Which is the labour situation of your accompanying person?                                                                                       | 1 = Working<br>2 = Unemployed<br>3 = Pensioner<br>4 = Sick leave<br>5 = Other          |
| Question 17                                                                                                                                               | Have you or the accompanying person any expenses when travelling to hospital?                                                                    | 1 = No<br>2 = Yes                                                                      |
| Question 18                                                                                                                                               | Budget spent                                                                                                                                     | In euros                                                                               |
| Question 19                                                                                                                                               | How many times have you phoned to the pacemakers office at hospital?                                                                             | 1 = None<br>2 = 1<br>3 = 2<br>4 = More than 2                                          |
| Question 20                                                                                                                                               | How many times have you attended the emergency ward for a problem related to your pacemaker in either the hospital or primary healthcare centre? | 1 = None<br>2 = 1<br>3 = 2<br>4 = More than 2                                          |

## NORDLAND STUDY – SUPPORTING INFORMATION

| Variables<br>Patient code | V1 | V2 | Q1 | Q2 | Q3 | Q4 | Q5 | Q6 | Q7 | Q8 | Q9 | Q10 | Q11 | Q12 | Q13 | Q14 | Q15 | Q16 | Q17 | Q18    | Q19 | Q20 |
|---------------------------|----|----|----|----|----|----|----|----|----|----|----|-----|-----|-----|-----|-----|-----|-----|-----|--------|-----|-----|
| 1                         | 1  | 0  | 4  | 5  | 4  | 4  | 2  | 4  | 4  | 1  | 1  | 4   | 100 | 5   | 3   | 3   | 1   |     | 2   | 332,25 | 1   | 1   |
| 2                         | 2  | 1  | 5  | 5  | 5  | 5  | 5  | 4  | 4  | 1  | 1  | 5   | 1   | 1   | 3   | 3   | 1   |     | 2   | 4,43   | 1   | 1   |
| 3                         | 1  | 0  | 5  | 5  | 4  | 5  | 2  | 5  | 5  | 1  | 2  | 5   | 25  | 3   | 3   | 3   | 1   |     | 1   | 0      | 1   | 1   |
| 4                         | 1  | 0  | 5  | 5  | 5  | 5  | 4  | 5  | 5  | 1  | 1  | 4   | 1   | 2   | 3   | 1   | 1   |     | 1   | 0      | 1   | 1   |
| 5                         | 2  | 1  | 4  | 4  | 4  | 4  | 4  | 4  | 5  | 1  | 1  | 4   | 60  | 4   | 5   | 3   | 1   |     | 1   | 0      | 1   | 1   |
| 6                         | 1  | 0  | 5  | 4  | 3  | 3  | 3  | 3  | 3  | 1  | 1  | 3   | 80  | 4   | 5   | 3   | 2   | 1   | 2   | 44,3   | 1   | 1   |
| 7                         | 1  | 0  | 3  | 4  | 2  | 3  | 1  | 3  | 3  | 1  | 1  | 3   | 30  | 3   | 5   | 3   | 2   | 1   | 2   | 11,08  | 1   | 1   |
| 8                         | 2  | 1  | 4  | 5  | 5  | 5  | 4  | 5  | 5  | 1  | 2  | 3   | 73  | 4   | 5   | 4   | 1   |     | 1   | 0      | 1   | 1   |
| 9                         | 2  | 1  | 5  | 5  | 5  | 5  | 4  | 4  | 5  | 1  | 1  | 5   | 1   | 1   | 5   | 4   | 1   |     | 2   | 22,15  | 1   | 1   |
| 10                        | 1  | 0  | 4  | 4  | 4  | 5  | 4  | 4  | 4  | 2  | 1  | 4   | 30  | 5   | 1   | 5   | 1   |     | 2   | 16,61  | 2   | 4   |
| 11                        | 1  | 0  | 5  | 5  | 4  | 4  | 2  | 4  | 5  | 1  | 2  | 4   | 90  | 5   | 1   | 3   | 1   |     | 2   | 27,69  | 1   | 1   |
| 12                        | 1  | 0  | 4  | 5  | 5  | 5  | 3  | 5  | 5  | 1  | 1  | 4   |     |     |     |     |     |     |     |        |     |     |
| 13                        | 1  | 0  | 5  | 5  | 3  | 4  | 2  | 6  | 3  | 1  | 1  | 1   |     | 5   | 4   | 3   | 1   | 3   | 2   | 27,69  | 1   | 1   |
| 14                        | 2  | 1  | 5  | 4  | 4  | 5  | 1  | 3  | 4  | 1  | 1  | 4   | 70  | 4   | 2   | 3   | 1   |     | 1   | 0      | 1   | 1   |
| 15                        | 1  | 0  | 5  | 5  | 4  | 5  | 2  | 4  | 5  | 1  | 2  | 5   | 60  | 5   | 1   | 3   | 1   |     | 1   | 0      | 1   | 1   |
| 16                        | 1  | 0  | 5  | 5  | 5  | 5  | 5  | 5  | 5  | 1  | 2  | 5   | 70  | 4   | 3   | 3   | 1   |     | 2   | 22,15  | 1   | 1   |
| 17                        | 2  | 1  | 5  | 5  | 5  | 4  | 5  | 4  | 5  | 1  | 1  | 4   | 70  | 5   | 3   | 3   | 1   |     | 1   | 0      | 1   | 1   |
| 18                        | 1  | 0  | 3  | 4  | 2  | 4  | 1  | 4  | 4  | 1  | 2  | 3   | 55  | 5   | 5   | 3   | 1   |     | 2   | 55,38  | 1   | 1   |
| 19                        | 2  | 1  | 4  | 5  | 5  | 5  | 6  | 5  | 5  | 1  | 2  | 5   | 130 | 5   | 5   | 4   | 1   |     | 1   | 0      | 1   | 1   |
| 20                        | 2  | 1  | 5  | 4  | 4  | 5  | 1  | 4  | 4  | 1  | 3  | 6   | 40  | 3   | 3   | 4   | 1   |     | 2   | 44,3   | 1   | 1   |
| 21                        | 2  | 1  |    |    |    |    |    |    |    |    |    |     |     |     |     |     |     |     |     |        |     |     |
| 22                        | 1  | 0  | 5  | 5  | 4  | 4  | 1  | 4  | 4  | 1  | 1  | 4   | 19  | 3   | 3   | 4   | 1   |     | 2   | 11,08  | 1   | 1   |
| 23                        | 2  | 1  | 5  | 5  | 5  | 5  | 2  | 4  | 5  | 1  | 1  | 4   | 20  | 3   | 4   | 4   | 2   | 1   | 2   | 35,44  | 1   | 1   |
| 24                        | 2  | 1  | 5  | 5  | 5  | 5  | 4  | 4  | 4  | 1  | 1  | 5   | 1   | 2   | 5   | 4   | 1   | 1   | 2   | 22,15  | 1   | 1   |
| 25                        | 2  | 1  | 4  | 5  | 4  | 4  | 4  | 5  | 5  | 1  | 1  | 5   | 78  | 5   | 3   | 4   | 2   | 1   | 1   | 0      | 1   | 4   |

## NORDLAND STUDY – SUPPORTING INFORMATION

|    |   |   |   |   |   |   |   |   |   |   |   |   |     |   |   |   |   |   |   |        |   |   |
|----|---|---|---|---|---|---|---|---|---|---|---|---|-----|---|---|---|---|---|---|--------|---|---|
| 26 | 2 | 1 | 5 | 5 | 5 | 5 | 5 | 4 | 4 | 1 | 4 | 5 | 100 | 2 | 3 | 4 | 2 |   | 2 | 33,23  | 4 | 1 |
| 27 | 2 | 1 | 2 | 5 | 1 | 3 | 1 | 5 | 5 | 1 | 1 | 3 | 300 | 5 | 1 | 4 | 2 | 3 | 2 | 110,75 | 1 | 1 |
| 28 | 1 | 0 | 4 | 4 | 4 | 4 | 2 | 4 | 5 | 1 | 1 | 4 | 100 | 5 | 1 | 4 | 1 |   | 2 | 15,51  | 1 | 1 |
| 29 | 1 | 0 | 4 | 4 | 4 | 4 | 3 | 4 | 4 | 1 | 1 | 5 | 1   | 2 | 5 | 4 | 1 |   | 1 | 0      | 1 | 1 |
| 30 | 2 | 1 | 4 | 5 | 4 | 4 | 4 | 4 | 4 | 1 | 1 | 5 | 8   | 5 | 1 | 3 | 1 |   | 2 | 55,38  | 1 | 1 |
| 31 | 2 | 1 | 5 | 5 | 5 | 5 | 1 | 5 | 5 | 1 | 1 | 5 | 3   | 2 | 4 | 4 | 2 | 1 | 2 | 22,15  | 1 | 1 |
| 32 | 1 | 0 | 4 | 4 | 3 | 4 | 3 | 4 | 5 | 1 | 1 | 5 | 120 | 5 | 3 | 4 | 1 |   | 2 | 22,15  | 1 | 2 |
| 33 | 2 | 0 | 5 | 5 | 5 | 5 | 2 | 5 | 5 | 1 | 1 | 5 | 10  | 3 | 3 | 4 | 1 |   | 2 | 8,86   | 1 | 1 |
| 34 | 1 | 0 | 5 | 5 | 4 | 5 | 2 | 4 | 4 | 1 | 1 | 5 | 165 | 5 | 3 | 4 | 1 |   | 2 | 16,61  | 1 | 1 |
| 35 | 2 | 0 | 5 | 5 | 4 | 5 | 2 | 4 | 4 | 1 | 1 | 5 | 6   | 2 | 3 | 4 | 1 |   | 1 | 0      | 1 | 1 |
| 36 | 1 | 1 | 4 | 5 | 4 | 3 | 3 | 4 | 3 | 3 | 1 | 2 | 4   | 2 | 1 | 4 | 1 |   | 2 | 33,23  | 2 | 2 |
| 37 | 2 | 1 | 4 | 3 | 5 | 5 | 3 | 3 | 3 | 1 | 1 | 4 | 60  | 3 | 5 | 3 | 1 | 3 | 2 | 11,08  | 1 | 1 |
| 38 | 1 | 1 | 5 | 5 | 5 | 5 | 5 | 5 | 5 | 1 | 1 | 5 | 500 | 5 | 1 | 5 | 1 |   | 1 | 0      | 1 | 1 |
| 39 | 2 | 0 | 4 | 5 | 4 | 5 | 2 | 4 | 5 | 1 | 2 | 4 | 200 | 5 | 3 | 3 | 2 | 3 | 2 | 66,45  | 1 | 1 |
| 40 | 2 | 0 | 5 | 5 | 5 | 5 | 2 | 5 | 5 | 1 | 2 | 5 | 50  | 4 | 3 | 4 | 1 |   | 2 | 22,15  | 1 | 1 |
| 41 | 1 | 0 | 1 | 5 | 5 | 5 | 2 | 5 | 5 | 1 | 1 | 5 | 20  | 3 | 3 | 3 | 1 |   | 2 | 50     | 1 | 1 |
| 42 | 2 | 0 | 5 | 4 | 4 | 4 | 4 | 4 | 4 | 2 | 1 | 5 | 8   | 2 | 1 | 1 | 1 |   | 2 | 5,54   | 1 | 1 |
| 43 | 1 | 1 | 5 | 5 | 4 | 4 | 4 | 4 | 4 | 1 | 2 | 5 | 80  | 5 | 3 | 3 | 1 |   | 2 | 77,53  | 2 | 1 |
| 44 | 2 | 1 | 5 | 4 | 5 | 5 | 4 | 4 | 4 | 1 | 1 | 5 | 3   | 2 | 4 | 3 | 1 |   | 2 | 22,15  | 1 | 1 |
| 45 | 2 | 1 | 5 | 5 | 2 | 4 | 1 | 5 | 5 | 1 | 1 | 5 |     |   |   |   |   |   |   |        |   |   |
| 46 | 1 | 1 | 4 | 4 | 4 | 4 | 3 | 4 | 5 | 1 | 1 | 4 | 300 | 5 | 1 | 3 | 1 |   | 2 | 77,53  | 4 | 1 |
| 47 | 1 | 0 | 3 | 5 | 3 | 5 | 3 | 4 | 5 | 1 | 1 | 1 | 1   | 1 | 3 | 4 | 2 | 4 | 1 | 0      | 1 | 1 |
| 48 | 1 | 0 | 4 | 4 | 4 | 5 | 3 | 4 | 5 | 1 | 1 | 5 | 370 | 5 | 1 | 4 | 1 |   | 2 | 0      | 1 | 1 |
| 49 | 2 | 0 | 5 | 5 | 5 | 5 | 2 | 5 | 5 | 1 | 1 | 4 | 5   | 1 | 3 | 1 | 1 |   | 1 |        | 1 | 1 |
| 50 | 1 | 1 | 5 | 5 | 5 | 5 | 5 | 5 | 5 | 1 | 1 | 4 |     |   |   |   |   |   |   |        |   |   |
